# Supplementary material for: LiV3O8 nanorods as cathode materials for high-power and long-life rechargeable lithium-ion batteries
Source: Royal Society of Chemistry journal article supplement (doi:10.1039/c4ra02269f), 2014-01-01
Supplement: c4ra02269f1.pdf [file c4ra02269f1.pdf]

## Supplementary Information

### **LiV<sub>3</sub>O<sub>8</sub> nanorods as cathode materials for high-power and long-life rechargeable lithium-ion batteries**

**Peng Mei,<sup>a,b</sup> Xing-Long Wu,<sup>\*a,b</sup> Haiming Xie,<sup>a,b</sup> Liqun Sun,<sup>a,b</sup> Yanping Zeng,<sup>a,b</sup> Jingping Zhang,<sup>\*a</sup> Linghua Tai,<sup>a,b</sup> Xin Guo,<sup>a,b</sup> Lina Cong,<sup>a,b</sup> Shunchao Ma,<sup>a,b</sup> Cen Yao,<sup>a,b</sup> and Rongshun Wang<sup>\*a,b</sup>**

*<sup>a</sup>Institute of Functional Materials, Department of Chemistry, Northeast Normal University, Changchun, Jilin 130024, P. R. China*

*<sup>b</sup>National & Local United Engineering Lab for Power Battery, Northeast Normal University; Changchun, Jilin 130024, P.R. China*

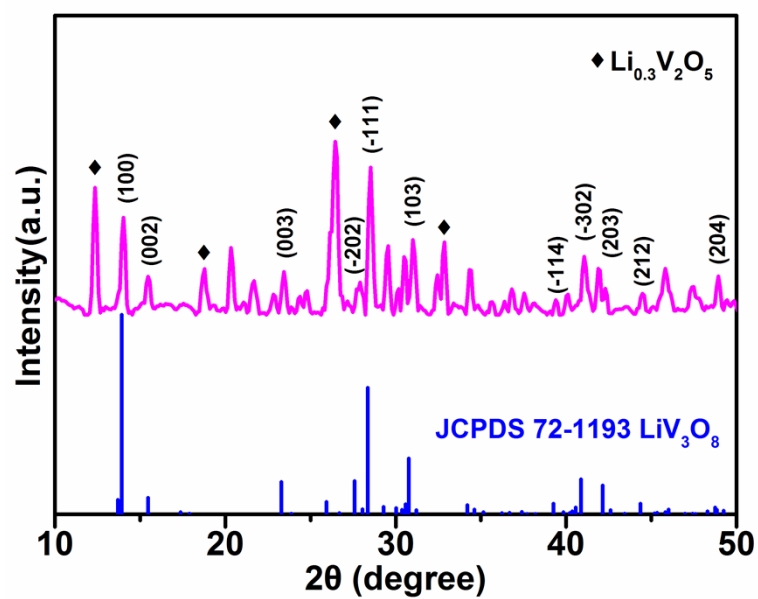

Fig. S1 XRD pattern of the bulk  $\text{LiV}_3\text{O}_8$ .

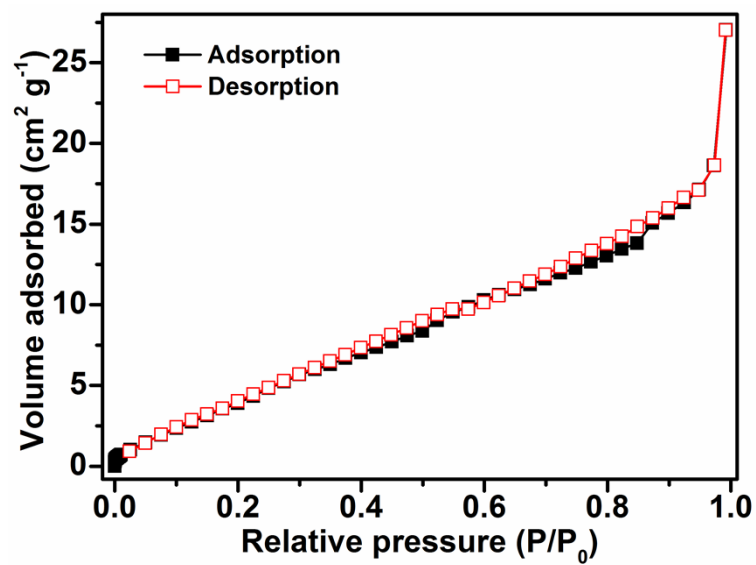

Fig. S2  $\text{N}_2$  adsorption/desorption isotherm of  $\text{LiV}_3\text{O}_8$  nanorods.

---

**Table S1** Impedance parameters of n-LVO and b-LVO calculated from equivalent circuit.

| Sample | $R_e$ (Ohm) | $R_{ct}$ (Ohm) | Chi-squared |
|--------|-------------|----------------|-------------|
| n-LVO  | 4.300       | 102.7          | 0.02467%    |
| b-LVO  | 4.272       | 255.8          | 0.03636%    |

**Table S2** linear fitting results for Warburg factor of n-LVO and b-LVO and the corresponding apparent diffusion coefficient.

| Sample | $\sigma$ | $D_{\text{apparent}}$ (cm <sup>2</sup> s <sup>-1</sup> ) |
|--------|----------|----------------------------------------------------------|
| n-LVO  | 10.95    | $2.918 \times 10^{-11}$                                  |
| b-LVO  | 25.68    | $5.303 \times 10^{-12}$                                  |
